June 2013

# PSYCHIATRIC SERVICES

A Journal of the  
American Psychiatric  
Association

- ◆ How Will the ACA Affect Funding of and Access to Behavioral Health Care?
- ◆ A Multifamily Group for Veterans With TBI: A Promising Approach
- ◆ VA's Leadership Role in Services Research: Seven New Reports
- ◆ How Do ACT Teams Promote Engagement? Intervention Strategies

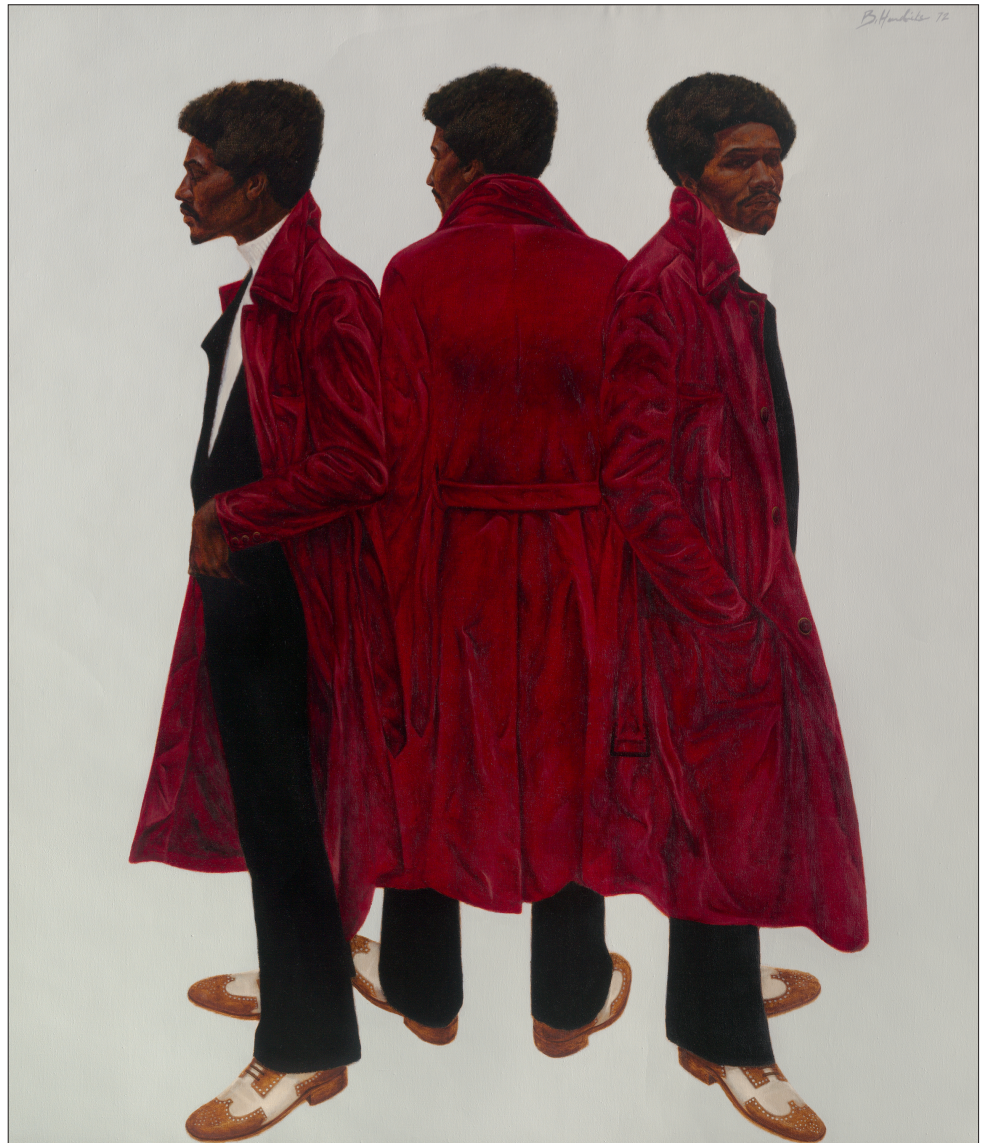

Source: http://ps.psychiatryonline.org/doi/suppl/10.1176/ps.2013.64.issue-6/suppl_file/cover.pdf
